# Supplementary material for: Light trapping in hematite-coated transparent particles for solar fuel generation
Source: Royal Society of Chemistry journal article supplement (doi:10.1039/c4ra15848b), 2015-01-01
Supplement: c4ra15848b1.pdf [file c4ra15848b1.pdf]

## Electronic Supplementary Information

# Light Trapping in Hematite-Coated Transparent Particles for Solar Fuel Generation

*Davood Danaei, <sup>a †</sup> Raheleh Saeidi, <sup>a †</sup> and Ali Dabirian, <sup>b \*</sup>*

*<sup>a</sup>Department of Physics, Tarbiat Modares University, P.O.BOX.14115-175, Tehran, Iran*

*<sup>b</sup>Photovoltaics and Thin Film Electronics Laboratory, Ecole Polytechnique Federale de Lausanne (EPFL), Rue de la Maladiere 71, Neuchatel 2000, Switzerland*

*<sup>†</sup>These Authors contributed equally to this work.*

\*E-mail: ali.dabirian@epfl.ch

| Complex refractive index ( $\eta=n+ik$ )data of TiO <sub>2</sub> |        |       | Complex refractive index ( $\eta=n+ik$ )data of Fe <sub>2</sub> O <sub>3</sub> |      |      |
|------------------------------------------------------------------|--------|-------|--------------------------------------------------------------------------------|------|------|
| Wavelength (nm)                                                  | n      | k     | Wavelength (nm)                                                                | n    | k    |
| 350                                                              | 2.8459 | 0.06  | 350                                                                            | 2.35 | 1.08 |
| 355                                                              | 2.8216 | 0.047 | 355                                                                            | 2.36 | 1.09 |
| 360                                                              | 2.7982 | 0.035 | 360                                                                            | 2.36 | 1.12 |
| 365                                                              | 2.7757 | 0.026 | 365                                                                            | 2.38 | 1.15 |
| 370                                                              | 2.7541 | 0.019 | 370                                                                            | 2.41 | 1.17 |
| 375                                                              | 2.7334 | 0.012 | 375                                                                            | 2.44 | 1.2  |
| 380                                                              | 2.7134 | 0.06  | 380                                                                            | 2.48 | 1.23 |
| 385                                                              | 2.6942 | 0.02  | 385                                                                            | 2.52 | 1.25 |
| 390                                                              | 2.6758 | 0     | 390                                                                            | 2.57 | 1.25 |
| 395                                                              | 2.6581 | 0     | 395                                                                            | 2.63 | 1.25 |
| 400                                                              | 2.6411 | 0     | 400                                                                            | 2.69 | 1.24 |
| 405                                                              | 2.6248 | 0     | 405                                                                            | 2.73 | 1.24 |
| 410                                                              | 2.6091 | 0     | 410                                                                            | 2.78 | 1.23 |
| 415                                                              | 2.594  | 0     | 415                                                                            | 2.82 | 1.23 |
| 420                                                              | 2.5796 | 0     | 420                                                                            | 2.87 | 1.21 |
| 425                                                              | 2.5657 | 0     | 425                                                                            | 2.91 | 1.18 |
| 430                                                              | 2.5524 | 0     | 430                                                                            | 2.95 | 1.15 |
| 435                                                              | 2.5396 | 0     | 435                                                                            | 2.99 | 1.11 |
| 440                                                              | 2.5273 | 0     | 440                                                                            | 3.02 | 1.07 |
| 445                                                              | 2.5155 | 0     | 445                                                                            | 3.04 | 1.02 |
| 450                                                              | 2.5042 | 0     | 450                                                                            | 3.06 | 0.97 |
| 455                                                              | 2.4933 | 0     | 455                                                                            | 3.08 | 0.93 |
| 460                                                              | 2.4829 | 0     | 460                                                                            | 3.1  | 0.89 |
| 465                                                              | 2.4728 | 0     | 465                                                                            | 3.11 | 0.86 |
| 470                                                              | 2.4632 | 0     | 470                                                                            | 3.12 | 0.83 |
| 475                                                              | 2.4539 | 0     | 475                                                                            | 3.13 | 0.81 |
| 480                                                              | 2.445  | 0     | 480                                                                            | 3.14 | 0.78 |
| 485                                                              | 2.4364 | 0     | 485                                                                            | 3.15 | 0.75 |

|     |        |   |     |      |      |
|-----|--------|---|-----|------|------|
| 490 | 2.4281 | 0 | 490 | 3.15 | 0.72 |
| 495 | 2.4202 | 0 | 495 | 3.15 | 0.69 |
| 500 | 2.4125 | 0 | 500 | 3.15 | 0.65 |
| 505 | 2.4051 | 0 | 505 | 3.14 | 0.63 |
| 510 | 2.3979 | 0 | 510 | 3.14 | 0.6  |
| 515 | 2.391  | 0 | 515 | 3.13 | 0.58 |
| 520 | 2.3844 | 0 | 520 | 3.13 | 0.57 |
| 525 | 2.3779 | 0 | 525 | 3.14 | 0.56 |
| 530 | 2.3717 | 0 | 530 | 3.14 | 0.54 |
| 535 | 2.3656 | 0 | 535 | 3.15 | 0.53 |
| 540 | 2.3597 | 0 | 540 | 3.17 | 0.52 |
| 545 | 2.354  | 0 | 545 | 3.19 | 0.51 |
| 550 | 2.3485 | 0 | 550 | 3.2  | 0.49 |
| 555 | 2.3431 | 0 | 555 | 3.21 | 0.47 |
| 560 | 2.3378 | 0 | 560 | 3.22 | 0.43 |
| 565 | 2.3327 | 0 | 565 | 3.23 | 0.4  |
| 570 | 2.3276 | 0 | 570 | 3.23 | 0.36 |
| 575 | 2.3227 | 0 | 575 | 3.22 | 0.31 |
| 580 | 2.318  | 0 | 580 | 3.21 | 0.27 |
| 585 | 2.3133 | 0 | 585 | 3.19 | 0.23 |
| 590 | 2.3087 | 0 | 590 | 3.17 | 0.2  |
| 595 | 2.3042 | 0 | 595 | 3.14 | 0.18 |
| 600 | 2.2997 | 0 | 600 | 3.12 | 0.16 |
| 605 | 2.2954 | 0 | 605 | 3.1  | 0.14 |
| 610 | 2.2911 | 0 | 610 | 3.08 | 0.13 |
| 615 | 2.2869 | 0 | 615 | 3.06 | 0.12 |
| 620 | 2.2827 | 0 | 620 | 3.04 | 0.11 |
| 625 | 2.2786 | 0 | 625 | 3.03 | 0.1  |
| 630 | 2.2746 | 0 | 630 | 3.01 | 0.09 |
| 635 | 2.2706 | 0 | 635 | 3    | 0.09 |
| 640 | 2.2667 | 0 | 640 | 2.98 | 0.08 |
| 645 | 2.2629 | 0 | 645 | 2.97 | 0.08 |
| 650 | 2.2591 | 0 | 650 | 2.96 | 0.07 |
| 655 | 2.2554 | 0 | 655 | 2.95 | 0.07 |
| 660 | 2.2517 | 0 | 660 | 2.94 | 0.07 |
| 665 | 2.248  | 0 | 665 | 2.93 | 0.06 |
| 670 | 2.2445 | 0 | 670 | 2.92 | 0.06 |
| 675 | 2.241  | 0 | 675 | 2.91 | 0.06 |
| 680 | 2.2376 | 0 | 680 | 2.9  | 0.06 |
| 685 | 2.2342 | 0 | 685 | 2.89 | 0.05 |
| 690 | 2.2309 | 0 | 690 | 2.88 | 0.05 |
| 695 | 2.2277 | 0 | 695 | 2.88 | 0.05 |
| 700 | 2.2246 | 0 | 700 | 2.87 | 0.05 |
| 705 | 2.2215 | 0 | 705 | 2.86 | 0.04 |
| 710 | 2.2186 | 0 | 710 | 2.85 | 0.04 |
| 715 | 2.2157 | 0 | 715 | 2.84 | 0.04 |
| 720 | 2.213  | 0 | 720 | 2.84 | 0.04 |
| 725 | 2.2104 | 0 | 725 | 2.83 | 0.04 |
| 730 | 2.2079 | 0 | 730 | 2.83 | 0.04 |
| 735 | 2.2055 | 0 | 735 | 2.82 | 0.04 |

|     |        |   |     |      |      |
|-----|--------|---|-----|------|------|
| 740 | 2.2033 | 0 | 740 | 2.81 | 0.04 |
| 745 | 2.2012 | 0 | 745 | 2.81 | 0.04 |
| 750 | 2.1993 | 0 | 750 | 2.8  | 0.03 |
| 755 | 2.1976 | 0 | 755 | 2.8  | 0.03 |
| 760 | 2.196  | 0 | 760 | 2.79 | 0.03 |
| 765 | 2.1946 | 0 | 765 | 2.79 | 0.03 |
| 770 | 2.1935 | 0 | 770 | 2.78 | 0.03 |
| 775 | 2.1925 | 0 | 775 | 2.78 | 0.03 |
| 780 | 2.1918 | 0 | 780 | 2.77 | 0.03 |
| 785 | 2.1914 | 0 | 785 | 2.77 | 0.03 |
| 790 | 2.1912 | 0 | 790 | 2.76 | 0.03 |
| 795 | 2.1913 | 0 | 795 | 2.76 | 0.03 |
| 800 | 2.1916 | 0 | 800 | 2.76 | 0.03 |
